# Supplementary material for: CHIP promotes Runx2 degradation and negatively regulates osteoblast differentiation
Source: PubMed Central journal article supplement — J Cell Biol. 2008 Jun 16;181(6):959–72. doi: 10.1083/jcb.200711044 (PMC2426947; doi:10.1083/jcb.200711044), 2008-06-16
Supplement: jcb.200711044_6.pdf [file jcb.200711044_6.pdf]

Table S1. **Primers used in real-time/RT-PCR**

| <b>Gene</b>   | <b>Primers (forward and reverse)</b>                    |
|---------------|---------------------------------------------------------|
| 18s rRNA      | 5'-GAGAAACGGCTACCACATCC-3'; 5'-CCTCCAATGGATCCTCGTTA-3'  |
| BSP           | 5'-AGGGAACGACCAGTGTGG-3'; 5'-TCGTTGCCCTGTTGTCGTA-3'     |
| OCN           | 5'-AAGCAGGAGGGCAATAAGGT-3'; 5'-GCGGTCTTCAAGCCATACTG-3'  |
| CHIP          | 5'-CCTATGACCGCAAGGACCATT-3'; 5'-CTCTACCCAGCCGTTCTCAG-3' |
| CEBP $\alpha$ | 5'-GCAGTGTGCACGTCTATGCT-3'; 5'-CCCAAACATCCCTAAACCAA-3'  |
| PPAR $\gamma$ | 5'-AGCCCATCGAGGACATCAA-3'; 5'-TGCTCTGTGACGATCTGCCT-3'   |
| Runx2         | 5'-CTTCACAAATCCTCCCAAG-3'; 5'-GAATGCGCCCTAAATCACTG-3'   |
| Smurf1        | 5'-ATCGACTCCCACCCTATGA-3'; 5'-TCTGGTGGTTGTGAGCAAGA-3'   |
| WWP1          | 5'-TACGAATGCGACTCTTGCAAG-3'; 5'-AACCAGGTGTCTTTGCCAAC-3' |
| Shn3          | 5'-CTCAGACACGCTCCAAA-3'; 5'-AGCTGCCGTAGTCAAAGGA-3'      |
